# Supplementary material
Source: PubMed Central journal article supplement (PMC11386157)
Supplement: PBI-19-64-s001.pdf [file PBI-19-64-s001.pdf]

**Table S1. Comparison of agronomic traits of IL55 and *tac4* plants.**

| traits                    | SH55        | <i>tac4</i>   |
|---------------------------|-------------|---------------|
| Tiller number             | 11.80±1.65  | 13.44±2.08    |
| Panicle length (cm)       | 23.46±0.56  | 15.65±0.23**  |
| Primary branch            | 12.10±0.26  | 10.83±0.71**  |
| Secondary branch          | 30.7±2.36   | 20.55±3.61**  |
| Grain number              | 161.20±8.11 | 135.85±9.12** |
| seed set rates (%)        | 0.85±0.02   | 0.61±0.01**   |
| Grain yield per plant (g) | 24.21±1.59  | 14.05±1.74**  |

All phenotypic data were measured from plants grown in a paddy field under natural conditions in Beijing, China. Values are means± SD (n = 30). Student's *t*- tests were used to generate *P* values (\*\* *P* < 0.01).

**Table S2. Summary of the *TAC4* allele type in each wild strain and cultivar in the rice germplasm core collection.**

| <b>Variety</b>         | <b>species</b>   | <b>Subspecies</b> | <b>Origin</b> | <b>allele type</b> |
|------------------------|------------------|-------------------|---------------|--------------------|
| Nanxiongzaoyouzhao     | <i>O. sativa</i> | <i>indica</i>     | China         | Hap1               |
| Xiangaizao 10          | <i>O. sativa</i> | <i>indica</i>     | China         | Hap1               |
| Nantehao               | <i>O. sativa</i> | <i>indica</i>     | China         | Hap1               |
| Zaoxian140             | <i>O. sativa</i> | <i>indica</i>     | China         | Hap1               |
| Taishannuo             | <i>O. sativa</i> | <i>indica</i>     | China         | Hap1               |
| Hengxianliangchunbengu | <i>O. sativa</i> | <i>indica</i>     | China         | Hap1               |
| Liuyenian              | <i>O. sativa</i> | <i>indica</i>     | China         | Hap1               |
| Xuanenchangtanchunnian | <i>O. sativa</i> | <i>indica</i>     | China         | Hap1               |
| Zaomadao               | <i>O. sativa</i> | <i>indica</i>     | China         | Hap1               |
| Meihuanuo              | <i>O. sativa</i> | <i>indica</i>     | China         | Hap1               |
| ZhuzhenB               | <i>O. sativa</i> | <i>indica</i>     | China         | Hap1               |
| Chaoyang1B             | <i>O. sativa</i> | <i>indica</i>     | China         | Hap1               |
| L310B                  | <i>O. sativa</i> | <i>indica</i>     | China         | Hap1               |
| Jinnante43B            | <i>O. sativa</i> | <i>indica</i>     | China         | Hap1               |
| Zhenshan97B            | <i>O. sativa</i> | <i>indica</i>     | China         | Hap1               |
| Biaoxie123B            | <i>O. sativa</i> | <i>indica</i>     | China         | Hap1               |
| 80B                    | <i>O. sativa</i> | <i>indica</i>     | China         | Hap1               |
| Baoxie7B               | <i>O. sativa</i> | <i>indica</i>     | China         | Hap1               |
| Guangluai4             | <i>O. sativa</i> | <i>indica</i>     | China         | Hap1               |
| Aijiaonante            | <i>O. sativa</i> | <i>indica</i>     | China         | Hap1               |
| Shufeng101             | <i>O. sativa</i> | <i>indica</i>     | China         | Hap1               |
| Leihuozhan             | <i>O. sativa</i> | <i>indica</i>     | China         | Hap1               |
| Dongtingwanxian        | <i>O. sativa</i> | <i>indica</i>     | China         | Hap1               |
| Aijiaozao              | <i>O. sativa</i> | <i>indica</i>     | China         | Hap1               |
| Wanlixian              | <i>O. sativa</i> | <i>indica</i>     | China         | Hap1               |
| IR 661-1               | <i>O. sativa</i> | <i>indica</i>     | China         | Hap1               |
| Liusha1                | <i>O. sativa</i> | <i>indica</i>     | China         | Hap1               |
| Erjiunan1              | <i>O. sativa</i> | <i>indica</i>     | China         | Hap1               |
| Nanjing11              | <i>O. sativa</i> | <i>indica</i>     | China         | Hap1               |
| Chengduai3             | <i>O. sativa</i> | <i>indica</i>     | China         | Hap1               |
| Sanbaili               | <i>O. sativa</i> | <i>indica</i>     | China         | Hap1               |
| Esiniu                 | <i>O. sativa</i> | <i>indica</i>     | China         | Hap1               |
| Heidu4                 | <i>O. sativa</i> | <i>indica</i>     | China         | Hap1               |
| Dongtingwanxian        | <i>O. sativa</i> | <i>indica</i>     | China         | Hap1               |
| Xiangdao               | <i>O. sativa</i> | <i>indica</i>     | China         | Hap1               |
| Mamagu                 | <i>O. sativa</i> | <i>indica</i>     | China         | Hap1               |
| Honggu                 | <i>O. sativa</i> | <i>indica</i>     | China         | Hap1               |
| Fanhaopi               | <i>O. sativa</i> | <i>indica</i>     | China         | Hap1               |
| XiangaiB               | <i>O. sativa</i> | <i>indica</i>     | China         | Hap1               |
| Jiangnongzao1B         | <i>O. sativa</i> | <i>indica</i>     | China         | Hap1               |

|                   |                  |               |             |      |
|-------------------|------------------|---------------|-------------|------|
| Dianrui409B       | <i>O. sativa</i> | <i>indica</i> | China       | Hap1 |
| 88B               | <i>O. sativa</i> | <i>indica</i> | China       | Hap1 |
| Gu154             | <i>O. sativa</i> | <i>indica</i> | China       | Hap1 |
| Gui630            | <i>O. sativa</i> | <i>indica</i> | China       | Hap1 |
| Teqingxuanhui     | <i>O. sativa</i> | <i>indica</i> | China       | Hap1 |
| Xianghui91269     | <i>O. sativa</i> | <i>indica</i> | China       | Hap1 |
| Aimakang          | <i>O. sativa</i> | <i>indica</i> | China       | Hap1 |
| Guichao2          | <i>O. sativa</i> | <i>indica</i> | China       | Hap1 |
| Xiangwanxian1     | <i>O. sativa</i> | <i>indica</i> | China       | Hap1 |
| Aituogu151        | <i>O. sativa</i> | <i>indica</i> | China       | Hap1 |
| Huangsiguizhan    | <i>O. sativa</i> | <i>indica</i> | China       | Hap1 |
| Xiangwanxian3     | <i>O. sativa</i> | <i>indica</i> | China       | Hap1 |
| Chengnongshuijing | <i>O. sativa</i> | <i>indica</i> | China       | Hap1 |
| Qitougu           | <i>O. sativa</i> | <i>indica</i> | China       | Hap1 |
| Jinzhinuo         | <i>O. sativa</i> | <i>indica</i> | China       | Hap1 |
| Ximaxian          | <i>O. sativa</i> | <i>indica</i> | China       | Hap1 |
| Wuzuihonggu       | <i>O. sativa</i> | <i>indica</i> | China       | Hap1 |
| Maweinian         | <i>O. sativa</i> | <i>indica</i> | China       | Hap1 |
| Taizhong65        | <i>O. sativa</i> | <i>indica</i> | China       | Hap1 |
| Qingsiai16B       | <i>O. sativa</i> | <i>indica</i> | China       | Hap1 |
| Yangdao2          | <i>O. sativa</i> | <i>indica</i> | China       | Hap1 |
| Dianxian232       | <i>O. sativa</i> | <i>indica</i> | China       | Hap1 |
| Aimi              | <i>O. sativa</i> | <i>indica</i> | China       | Hap1 |
| Biwusheng         | <i>O. sativa</i> | <i>indica</i> | China       | Hap1 |
| Achar Bhog        | <i>O. sativa</i> | <i>indica</i> | Bangladesh  | Hap1 |
| Bhat Mukhu        | <i>O. sativa</i> | <i>indica</i> | Bangladesh  | Hap1 |
| Colombo           | <i>O. sativa</i> | <i>indica</i> | India       | Hap1 |
| DoDo              | <i>O. sativa</i> | <i>indica</i> | Philippines | Hap1 |
| Hr33              | <i>O. sativa</i> | <i>indica</i> | Philippines | Hap1 |
| R2389             | <i>O. sativa</i> | <i>indica</i> | Philippines | Hap1 |
| Act               | <i>O. sativa</i> | <i>indica</i> | Philippines | Hap1 |
| Lchsannde         | <i>O. sativa</i> | <i>indica</i> | Philippines | Hap1 |
| Rikn-2            | <i>O. sativa</i> | <i>indica</i> | Philippines | Hap1 |
| Agbede            | <i>O. sativa</i> | <i>indica</i> | Philippines | Hap1 |
| Hoshikalmi        | <i>O. sativa</i> | <i>indica</i> | Philippines | Hap1 |
| DM36              | <i>O. sativa</i> | <i>indica</i> | Vietnam     | Hap1 |
| Lili356           | <i>O. sativa</i> | <i>indica</i> | Korea       | Hap1 |
| NR10045-20-3-2    | <i>O. sativa</i> | <i>indica</i> | Nepal       | Hap1 |
| O-Goo-Thou        | <i>O. sativa</i> | <i>indica</i> | Nepal       | Hap1 |
| Mab Suri          | <i>O. sativa</i> | <i>indica</i> | Malaysia    | Hap1 |
| Sein Ta lay       | <i>O. sativa</i> | <i>indica</i> | Myanmar     | Hap1 |
| Horomamawee       | <i>O. sativa</i> | <i>indica</i> | Sri Lanka   | Hap1 |
| Tcanuto           | <i>O. sativa</i> | <i>indica</i> | Philippines | Hap1 |
| Naw Sadui         | <i>O. sativa</i> | <i>indica</i> | Thailand    | Hap1 |

|                     |                  |                 |            |      |
|---------------------|------------------|-----------------|------------|------|
| Kalu Murunga        | <i>O. sativa</i> | <i>indica</i>   | Pakistan   | Hap1 |
| XX-4                | <i>O. sativa</i> | <i>indica</i>   | Thailand   | Hap1 |
| Lateefy             | <i>O. sativa</i> | <i>indica</i>   | Pakistan   | Hap1 |
| Re Them Ha Dong     | <i>O. sativa</i> | <i>indica</i>   | Vietnam    | Hap1 |
| Sai Duong Thamhheai | <i>O. sativa</i> | <i>indica</i>   | Vietnam    | Hap1 |
| Tep1                | <i>O. sativa</i> | <i>indica</i>   | Vietnam    | Hap1 |
| Tep2                | <i>O. sativa</i> | <i>indica</i>   | Vietnam    | Hap1 |
| DR32                | <i>O. sativa</i> | <i>indica</i>   | Vietnam    | Hap1 |
| Chakula             | <i>O. sativa</i> | <i>indica</i>   | Bangladesh | Hap1 |
| Kangpur             | <i>O. sativa</i> | <i>indica</i>   | Bangladesh | Hap1 |
| GH 319              | <i>O. sativa</i> | <i>indica</i>   | Indonesia  | Hap1 |
| Beok Montor         | <i>O. sativa</i> | <i>indica</i>   | Indonesia  | Hap1 |
| Bali Ketumbaran     | <i>O. sativa</i> | <i>indica</i>   | Indonesia  | Hap1 |
| Beri                | <i>O. sativa</i> | <i>indica</i>   | Bangladesh | Hap1 |
| OKamuna             | <i>O. sativa</i> | <i>indica</i>   | India      | Hap1 |
| OKabahulo           | <i>O. sativa</i> | <i>indica</i>   | Bangladesh | Hap1 |
| Kele                | <i>O. sativa</i> | <i>indica</i>   | Bangladesh | Hap1 |
| Hongwan1            | <i>O. sativa</i> | <i>indica</i>   | China      | Hap1 |
| Huke3               | <i>O. sativa</i> | <i>indica</i>   | China      | Hap1 |
| Tieganwu            | <i>O. sativa</i> | <i>japonica</i> | China      | Hap1 |
| Muguanuo            | <i>O. sativa</i> | <i>japonica</i> | China      | Hap1 |
| Qitoubaigu          | <i>O. sativa</i> | <i>japonica</i> | China      | Hap1 |
| AnnongwangengB      | <i>O. sativa</i> | <i>japonica</i> | China      | Hap1 |
| Ninghui21           | <i>O. sativa</i> | <i>japonica</i> | China      | Hap1 |
| Jan-76              | <i>O. sativa</i> | <i>japonica</i> | China      | Hap1 |
| Guihuahuang         | <i>O. sativa</i> | <i>japonica</i> | China      | Hap1 |
| Xiugunuo            | <i>O. sativa</i> | <i>japonica</i> | China      | Hap1 |
| jixuenuo            | <i>O. sativa</i> | <i>japonica</i> | China      | Hap1 |
| Jing7623            | <i>O. sativa</i> | <i>japonica</i> | China      | Hap1 |
| Gongju73            | <i>O. sativa</i> | <i>japonica</i> | China      | Hap1 |
| Youmangzaogeng      | <i>O. sativa</i> | <i>japonica</i> | China      | Hap1 |
| Bawangbian          | <i>O. sativa</i> | <i>japonica</i> | China      | Hap1 |
| Xibainian           | <i>O. sativa</i> | <i>japonica</i> | China      | Hap1 |
| Xianggu             | <i>O. sativa</i> | <i>japonica</i> | China      | Hap1 |
| Beizينو             | <i>O. sativa</i> | <i>japonica</i> | China      | Hap1 |
| JinghuB             | <i>O. sativa</i> | <i>japonica</i> | China      | Hap1 |
| Gzhenshan97B        | <i>O. sativa</i> | <i>japonica</i> | China      | Hap1 |
| Dangyu5             | <i>O. sativa</i> | <i>japonica</i> | China      | Hap1 |
| Xiaohonggu          | <i>O. sativa</i> | <i>japonica</i> | China      | Hap1 |
| Banjiemang          | <i>O. sativa</i> | <i>japonica</i> | China      | Hap1 |
| PeiC122             | <i>O. sativa</i> | <i>japonica</i> | China      | Hap1 |
| OKWR 221            | <i>O. sativa</i> | <i>japonica</i> | China      | Hap1 |
| OKabonl             | <i>O. sativa</i> | <i>japonica</i> | Bangladesh | Hap1 |
| Padi Lasat          | <i>O. sativa</i> | <i>japonica</i> | Malaysia   | Hap1 |

|                          |                  |                 |             |      |
|--------------------------|------------------|-----------------|-------------|------|
| Kasinkan                 | <i>O. sativa</i> | <i>japonica</i> | Japan       | Hap1 |
| Fushan                   | <i>O. sativa</i> | <i>japonica</i> | Japan       | Hap1 |
| Muqiuxiu                 | <i>O. sativa</i> | <i>japonica</i> | China       | Hap1 |
| C418                     | <i>O. sativa</i> | <i>japonica</i> | China       | Hap1 |
| Zegu                     | <i>O. sativa</i> | <i>japonica</i> | China       | Hap1 |
| Babaili                  | <i>O. sativa</i> | <i>japonica</i> | China       | Hap1 |
| Chikenuo                 | <i>O. sativa</i> | <i>indica</i>   | China       | Hap2 |
| Chiem Bua                | <i>O. sativa</i> | <i>indica</i>   | Vietnam     | Hap2 |
| Ase Bolon Kamandi        | <i>O. sativa</i> | <i>indica</i>   | Indonesia   | Hap2 |
| Kathemax                 | <i>O. sativa</i> | <i>indica</i>   | Indonesia   | Hap2 |
| Barkat                   | <i>O. sativa</i> | <i>indica</i>   | India       | Hap2 |
| Kashmin Basmali          | <i>O. sativa</i> | <i>indica</i>   | Pakistan    | Hap2 |
| Basmati Dhan             | <i>O. sativa</i> | <i>indica</i>   | Pakistan    | Hap2 |
| Basmati Kamon            | <i>O. sativa</i> | <i>indica</i>   | Pakistan    | Hap2 |
| Basmati Hunar            | <i>O. sativa</i> | <i>indica</i>   | Pakistan    | Hap2 |
| Shuiyuan300li            | <i>O. sativa</i> | <i>japonica</i> | China       | Hap2 |
| Zhonglou1                | <i>O. sativa</i> | <i>japonica</i> | China       | Hap2 |
| Weiguo                   | <i>O. sativa</i> | <i>japonica</i> | China       | Hap2 |
| Zhonghua8                | <i>O. sativa</i> | <i>japonica</i> | China       | Hap2 |
| Jindao1                  | <i>O. sativa</i> | <i>japonica</i> | China       | Hap2 |
| Baigedao                 | <i>O. sativa</i> | <i>japonica</i> | China       | Hap2 |
| Liaojing287              | <i>O. sativa</i> | <i>japonica</i> | China       | Hap2 |
| Gaoyangdiandaodahongmang | <i>O. sativa</i> | <i>japonica</i> | China       | Hap2 |
| Muxiqiu                  | <i>O. sativa</i> | <i>japonica</i> | China       | Hap2 |
| Feidongtangdao           | <i>O. sativa</i> | <i>japonica</i> | China       | Hap2 |
| Hongqi5                  | <i>O. sativa</i> | <i>japonica</i> | China       | Hap2 |
| Guangkexiangnuo          | <i>O. sativa</i> | <i>japonica</i> | China       | Hap2 |
| Libu                     | <i>O. sativa</i> | <i>japonica</i> | Philippines | Hap2 |
| Kutube                   | <i>O. sativa</i> | <i>japonica</i> | Philippines | Hap2 |
| Lepqu                    | <i>O. sativa</i> | <i>japonica</i> | Philippines | Hap2 |
| Mack Kouk                | <i>O. sativa</i> | <i>japonica</i> | Laos        | Hap2 |
| Rasi Pagalou             | <i>O. sativa</i> | <i>japonica</i> | Malaysia    | Hap2 |
| Chabli Chabol Glang      | <i>O. sativa</i> | <i>japonica</i> | Thailand    | Hap2 |
| Do Khao                  | <i>O. sativa</i> | <i>japonica</i> | Laos        | Hap2 |
| Lepsang                  | <i>O. sativa</i> | <i>japonica</i> | Laos        | Hap2 |
| Agami M1                 | <i>O. sativa</i> | <i>japonica</i> | Philippines | Hap2 |
| Lukip                    | <i>O. sativa</i> | <i>japonica</i> | Philippines | Hap2 |
| Xitong400                | <i>O. sativa</i> | <i>japonica</i> | Korea       | Hap2 |
| Qingfeng                 | <i>O. sativa</i> | <i>japonica</i> | Japan       | Hap2 |
| Dupanyui                 | <i>O. sativa</i> | <i>japonica</i> | Indonesia   | Hap2 |
| Heritam                  | <i>O. sativa</i> | <i>japonica</i> | Indonesia   | Hap2 |
| Daoli                    | <i>O. sativa</i> | <i>japonica</i> | Japan       | Hap2 |
| Huanghai33               | <i>O. sativa</i> | <i>japonica</i> | Korea       | Hap2 |
| Duangenuo                | <i>O. sativa</i> | <i>japonica</i> | Japan       | Hap2 |

|                  |                     |                 |                            |      |
|------------------|---------------------|-----------------|----------------------------|------|
| Pingbei5         | <i>O. sativa</i>    | <i>japonica</i> | Korea                      | Hap2 |
| Pingbei9         | <i>O. sativa</i>    | <i>japonica</i> | Korea                      | Hap2 |
| Milizu           | <i>O. sativa</i>    | <i>japonica</i> | Korea                      | Hap2 |
| Xinchuanchinuo   | <i>O. sativa</i>    | <i>japonica</i> | Korea                      | Hap2 |
| Xiaoluohan       | <i>O. sativa</i>    | <i>japonica</i> | China                      | Hap2 |
| Changzhong       | <i>O. sativa</i>    | <i>japonica</i> | China                      | Hap2 |
| Sanchaoqi        | <i>O. sativa</i>    | <i>japonica</i> | China                      | Hap2 |
| Huangdao         | <i>O. sativa</i>    | <i>japonica</i> | China                      | Hap2 |
| PutaoLvzhong     | <i>O. sativa</i>    | <i>japonica</i> | China                      | Hap2 |
| Jinlaotou        | <i>O. sativa</i>    | <i>japonica</i> | China                      | Hap2 |
| Sanyiqian        | <i>O. sativa</i>    | <i>japonica</i> | China                      | Hap2 |
| Chenjianuo       | <i>O. sativa</i>    | <i>japonica</i> | China                      | Hap2 |
| Cunsanli         | <i>O. sativa</i>    | <i>japonica</i> | China                      | Hap2 |
| Ganshangchen     | <i>O. sativa</i>    | <i>japonica</i> | China                      | Hap2 |
| PADI PENOKULU    | <i>O. sativa</i>    | <i>japonica</i> | Indonesia                  | Hap2 |
| PADI KEPOK       | <i>O. sativa</i>    | <i>japonica</i> | Indonesia                  | Hap2 |
| Taibei309        | <i>O. sativa</i>    | <i>japonica</i> | Chinese Taipei             | Hap2 |
| LUK TAKHAA       | <i>O. sativa</i>    | <i>japonica</i> | Afghanistan                | Hap2 |
| Laohuzhong       | <i>O. sativa</i>    | <i>japonica</i> | China                      | Hap2 |
| Xingguo          | <i>O. sativa</i>    | <i>japonica</i> | China                      | Hap2 |
| Baimaodao        | <i>O. sativa</i>    | <i>japonica</i> | China                      | Hap2 |
| Longhuamaohulu   | <i>O. sativa</i>    | <i>japonica</i> | China                      | Hap2 |
| Nantiangangjiugu | <i>O. sativa</i>    | <i>japonica</i> | China                      | Hap2 |
| Mubangu          | <i>O. sativa</i>    | <i>japonica</i> | China                      | Hap2 |
| Methi Noi        | <i>O. sativa</i>    | <i>japonica</i> | Laos                       | Hap2 |
| Pingrang10       | <i>O. sativa</i>    | <i>japonica</i> | Korea                      | Hap2 |
| Gaoliqiu         | <i>O. sativa</i>    | <i>japonica</i> | Korea                      | Hap2 |
| ruf01            | <i>O. rufipogon</i> | perennial       | Philippines                | Hap1 |
| ruf02            | <i>O. rufipogon</i> | perennial       | Thailand                   | Hap1 |
| ruf03            | <i>O. rufipogon</i> | perennial       | Bangladesh                 | Hap1 |
| ruf04            | <i>O. rufipogon</i> | perennial       | China                      | Hap2 |
| ruf05            | <i>O. rufipogon</i> | perennial       | China                      | Hap2 |
| ruf06            | <i>O. rufipogon</i> | perennial       | China                      | Hap2 |
| ruf07            | <i>O. rufipogon</i> | perennial       | China                      | Hap2 |
| ruf08            | <i>O. rufipogon</i> | perennial       | China                      | Hap2 |
| ruf09            | <i>O. rufipogon</i> | perennial       | China                      | Hap2 |
| ruf10            | <i>O. rufipogon</i> | perennial       | China                      | Hap2 |
| ruf11            | <i>O. rufipogon</i> | perennial       | China                      | Hap2 |
| ruf12            | <i>O. rufipogon</i> | perennial       | china                      | Hap2 |
| ruf13            | <i>O. nivara</i>    | annual          | Chinese Taipei<br>(Taiwan) | Hap2 |
| ruf14            | <i>O. rufipogon</i> | perennial       | China                      | Hap2 |
| ruf15            | <i>O. rufipogon</i> | perennial       | China                      | Hap2 |
| ruf16            | <i>O. rufipogon</i> | perennial       | China                      | Hap2 |

---

|       |                     |           |             |      |
|-------|---------------------|-----------|-------------|------|
| ruf17 | <i>O. rufipogon</i> | perennial | China       | Hap2 |
| ruf18 | <i>O. rufipogon</i> | perennial | China       | Hap2 |
| ruf19 | <i>O. rufipogon</i> | perennial | China       | Hap2 |
| ruf20 | <i>O. rufipogon</i> | perennial | China       | Hap2 |
| ruf21 | <i>O. rufipogon</i> | perennial | China       | Hap2 |
| ruf22 | <i>O. rufipogon</i> | perennial | China       | Hap2 |
| ruf23 | <i>O. rufipogon</i> | perennial | China       | Hap2 |
| ruf24 | <i>O. rufipogon</i> | perennial | Cambodia    | Hap1 |
| ruf25 | <i>O. rufipogon</i> | perennial | Nepal       | Hap1 |
| ruf26 | <i>O. rufipogon</i> | perennial | Bangladesh  | Hap1 |
| ruf27 | <i>O. rufipogon</i> | perennial | Philippines | Hap1 |
| ruf28 | <i>O. rufipogon</i> | perennial | Laos        | Hap1 |
| ruf29 | <i>O. nivara</i>    | perennial | India       | Hap1 |
| ruf30 | <i>O. rufipogon</i> | perennial | China       | HAP2 |
| ruf31 | <i>O. rufipogon</i> | perennial | India       | Hap2 |
| ruf32 | <i>O. rufipogon</i> | perennial | China       | Hap5 |
| ruf33 | <i>O. rufipogon</i> | perennial | China       | Hap5 |
| ruf34 | <i>O. nivara</i>    | annual    | Laos        | Hap1 |
| ruf35 | <i>O. nivara</i>    | annual    | Sri Lanka   | Hap1 |
| ruf36 | <i>O. rufipogon</i> | perennial | India       | Hap3 |
| ruf37 | <i>O. rufipogon</i> | perennial | Bangladesh  | Hap4 |
| ruf38 | <i>O. rufipogon</i> | perennial | China       | Hap6 |
| ruf39 | <i>O. rufipogon</i> | perennial | Costarica   | Hap7 |
| ruf40 | <i>O. rufipogon</i> | perennial | China       | Hap1 |

---

**Table S3. Nucleotide diversity and Tajima's *D* test.**

|                  | <b>N</b> | <b>L</b> | <b>S</b> | <b>H</b> | <b><math>\pi</math></b> | <b><math>\theta_w</math></b> | <b>Tajima's <i>D</i></b> |
|------------------|----------|----------|----------|----------|-------------------------|------------------------------|--------------------------|
| <i>O. sativa</i> | 199      | 2433     | 3        | 3        | 0.00052                 | 0.00021                      | 2.3869                   |
| <i>indica</i>    | 112      | 2433     | 3        | 3        | 0.00015                 | 0.00023                      | -0.6179                  |
| <i>Japonica</i>  | 87       | 2433     | 3        | 3        | 0.00059                 | 0.00024                      | 2.5751*                  |
| wild rice        | 40       | 2433     | 26       | 14       | 0.00114                 | 0.00251                      | -1.8554*                 |

N, total number of sequences; L, average length (bp) of the sequences per taxon; S, number of polymorphic (segregating) sites; H, number of haplotypes;  $\pi$ , average number of pairwise nucleotide differences per site calculated based on the total number of polymorphic sites;  $\theta_w$ , Watterson's estimator of per base pair calculated based on the total number of polymorphic sites. Student's *t* tests were used to generate *P* values (\* *P* < 0.05).



**Table S4. The  $F_{st}$  analysis at the *TAC4* locus.**

| <b>Population 1</b> | <b>Population 2</b> | <b><math>F_{st}</math></b> |
|---------------------|---------------------|----------------------------|
| <i>ind</i>          | <i>jap</i>          | 0.49803                    |
| <i>ind</i>          | cultivates          | 0.16950                    |
| <i>ind</i>          | wild                | 0.23977                    |
| <i>jap</i>          | cultivates          | 0.16867                    |
| <i>jap</i>          | wild                | 0.28847                    |
| cultivates          | wild                | 0.17564                    |

**Table S5. Primers used in the study.**

| Name             | Forward primers (5'-3')              | Reverse primers (5'-3')               | Purpose           |
|------------------|--------------------------------------|---------------------------------------|-------------------|
| RM555            | TTGGATCAGCCAAAGGAGAC                 | CAGCATTGTGGCATGGATAC                  | mapping           |
| RM71             | CTAGAGGCGAAAACGAGATG                 | GGGTGGGCGAGGTAATAATG                  | mapping           |
| RM7632           | TATTTCTCGCCTATCTGCG                  | AAAGGTTGAGCACATGGACC                  | mapping           |
| RM3688           | GTTGAATCAAGCTGTGCAGC                 | AGCTAGGCAAAGCATGCATG                  | mapping           |
| RM3874           | TGGGTGATCTTAGTTGGCC                  | AATGTGCCTGCACATGTCAC                  | mapping           |
| RM13071          | ATGTGGGTGACGTACGGAACCTTG             | GGTAGGATTCCTTCGGATAGACAG              | mapping           |
| ID13046          | TTAGAAGGGAGTAAGGGTGTC                | TATAAAATCGCTCGTATTAATG                | mapping           |
| ID15467          | GAACAAACGCAGAGCACCTC                 | TTGCATTAGCGTTATTACTAGC                | mapping           |
| ID16147          | GCTGTTGGGCATTCAATTAT                 | CTGTTGTCTCCCGTATAGATGTG               | mapping           |
| <i>TAC4</i>      | AAGGTCGCAAACAAGCAG                   | AACTGCCAGGAGCAGAGAG                   | qRT-PCR           |
| <i>OsIAA20</i>   | TGGCGGATATGTGAAGGTGAA                | TATGAGCCGAGGATGGACAAG                 | qRT-PCR           |
| <i>YUCCA1</i>    | TCATCGGACGCCCTCAACGTCGC              | GGCAGAGCAAGATTATCAGTC                 | qRT-PCR           |
| <i>YUCCA2</i>    | GTCCAAAGGGAGGAGTCGTCCAG              | GCATGATGTTTACACCCGGCCTT               | qRT-PCR           |
| <i>YUCCA3</i>    | GTGAGAACGGGCTCTACTCGGTC              | GCTTATGCATGACCGATGAACAC               | qRT-PCR           |
| <i>YUCCA4</i>    | GCAGAATGGCCTGTACGCTGTTG              | CAGACCAGCACATGACGTGTCTA               | qRT-PCR           |
| <i>YUCCA5</i>    | CCTCCTACGACGCCGCCATGATC              | CTCCCAACACAGCGACGACAGAA               | qRT-PCR           |
| <i>YUCCA6</i>    | CCATTCCCAGATGGTTGGAAGG               | CATGTTGCGCCTCAAGATATTTG               | qRT-PCR           |
| <i>YUCCA7</i>    | CACTGCTGTGTCTACAATATCAC              | GGAGGTGCATCTCCGTCATCTTC               | qRT-PCR           |
| <i>TAR1</i>      | GTGGGCGCTGGTGAAGG                    | CGGGCGAAGTGGAACAGTC                   | qRT-PCR           |
| <i>TAR2</i>      | CCACTCCTCTTCGCCTGTTT                 | CACATCCTCCCTATCGCACC                  | qRT-PCR           |
| <i>TAC1</i>      | GAGATGGCTCTAAAGGTGTTT                | CGTGCCAATTGCAAGTATACC                 | qRT-PCR           |
| <i>Actin</i>     | TACAGTGTCTGGATTGGAGGAT               | TCTTGGCTTAGCATTCTTGGGT                | qRT-PCR           |
| <i>TAC4-OE</i>   | CGCGGTACCAGGAGTTCTCTCTTGT<br>GGTC    | GGACTAGTAGAGTGAGGAAGTAAGAA<br>TTAACAG | overexpression    |
| <i>TAC4-RNAi</i> | GGACTAGTGTGGCGAACCCGAAACT            | TTCGAGCTCGAAGCCATGGATTTGGC<br>A       | TAC4-RNAi         |
| <i>TAC4-2</i>    | CGCGGTACCAGGAGTTCTCTCTTGT<br>GGTC    | GCTCTAGACACTGAGGAGCGCTCCA             | TAC4-GFP          |
| <i>pTAC4</i>     | CGCGGATCCTGTAGCGTATGAGAGCA<br>TGTGAA | TGCACTGCAGTGGCGGCCGTCGACA<br>T        | <i>pTAC4::GUS</i> |
