# Supplementary material
Source: PubMed Central journal article supplement (PMC11386157)
Supplement: PBI-19-64-s002.pdf [file PBI-19-64-s002.pdf]

Figure S1

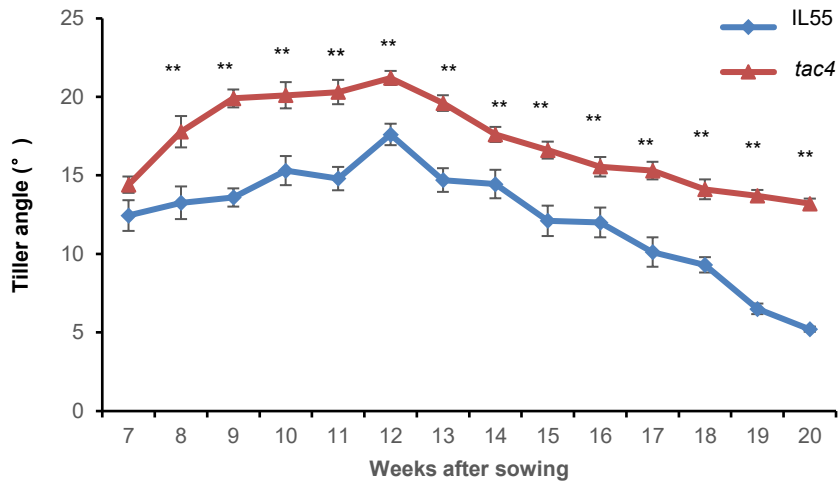

**Figure S1. Kinetic analysis of tiller angle between IL55 and the *tac4* mutant.** Error bars indicate SEM,  $n = 10$ . The double asterisks represent a significant difference determined by Student's *t*-test at  $P < 0.01$ .

Figure S2

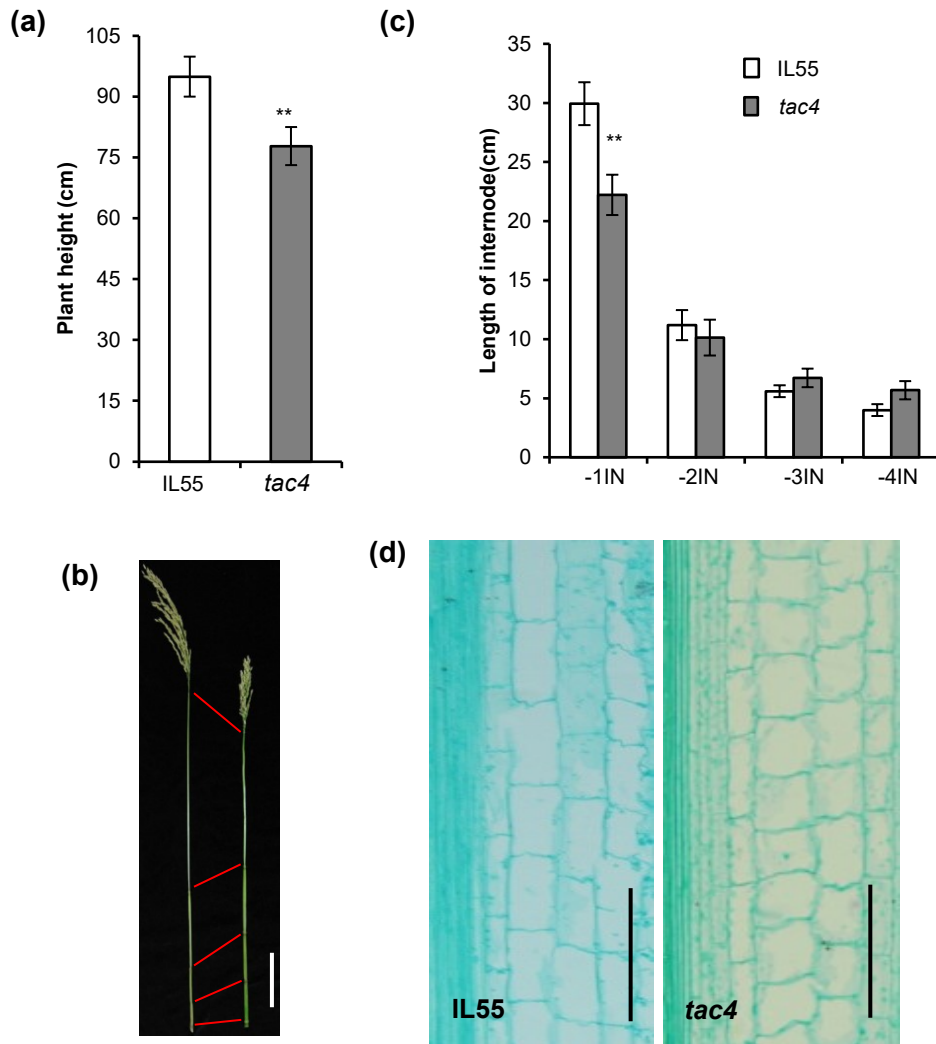

**Figure S2. *TAC4* regulates plant height.**

(a) Comparison of the plant height between IL55 and *tac4* mutant. (b-c) Internode length comparison. Scale bar, 10 cm. (d) Longitudinal sections of the uppermost internodes. Scale bar, 100 μm. Error bars indicate SD,  $n = 20$ . The double asterisks represent a significant difference determined by Student's *t* test at  $P < 0.01$ .

# Figure S3

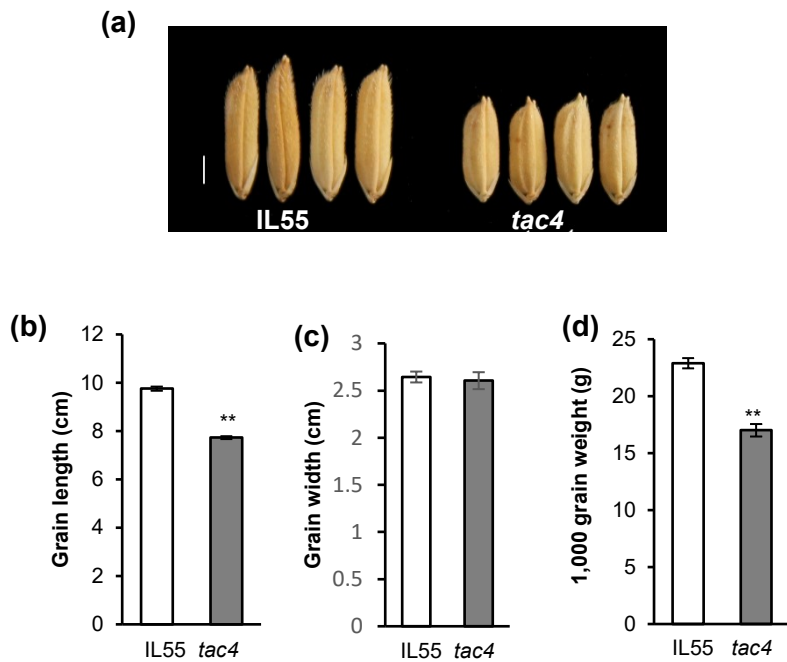

**Figure S3. *TAC4* regulates grain size and weight.**

(a) Grains of IL55 and *tac4*. Scale bar, 2 mm.

(b-d) Comparison of grain size and weight. The double asterisks represent a significant difference determined by Student's *t* test at  $P < 0.01$ .

Figure S4

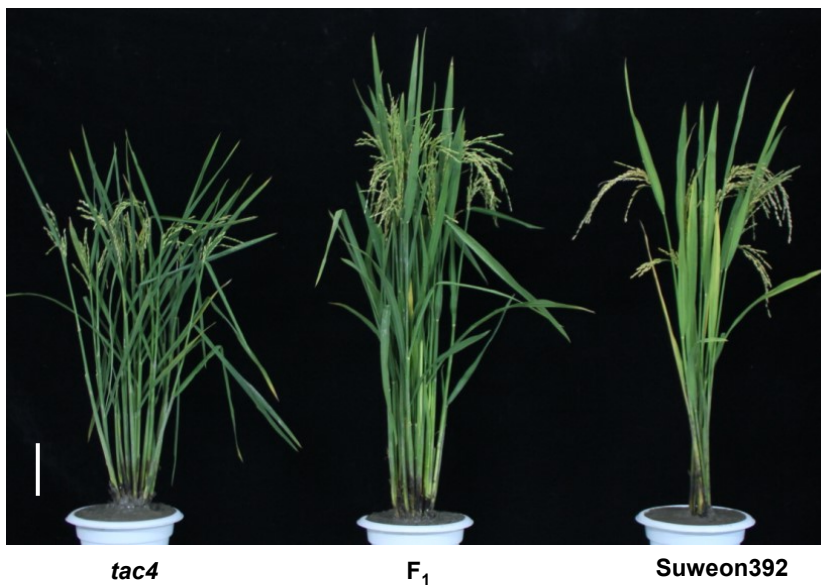

Figure S4. Phenotypic characterization of F<sub>1</sub> plants derived from a cross of between Suweon392 and the *tac4* mutant. Scale bar, 15 cm.

Figure S5

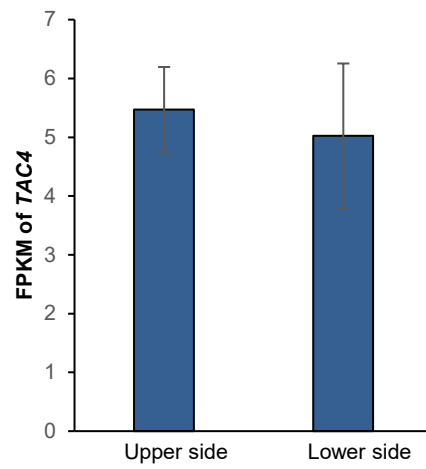

Figure S5. The FPKM values of *TAC4* in RNA-seq data of tiller bases of 70-day-old IL55. n=3

Figure S6

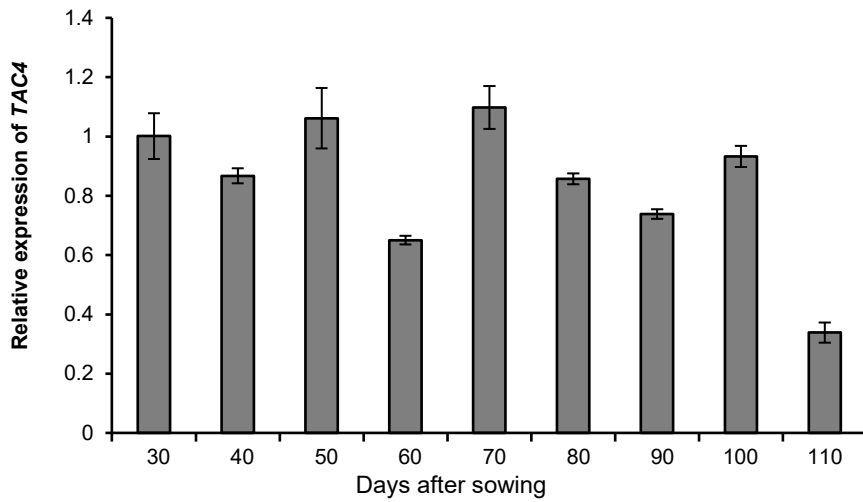

Figure S6. Kinetic analysis of the transcript abundance of *TAC4*. values are  $\pm$  SD ( $n = 3$ ).

Figure S7

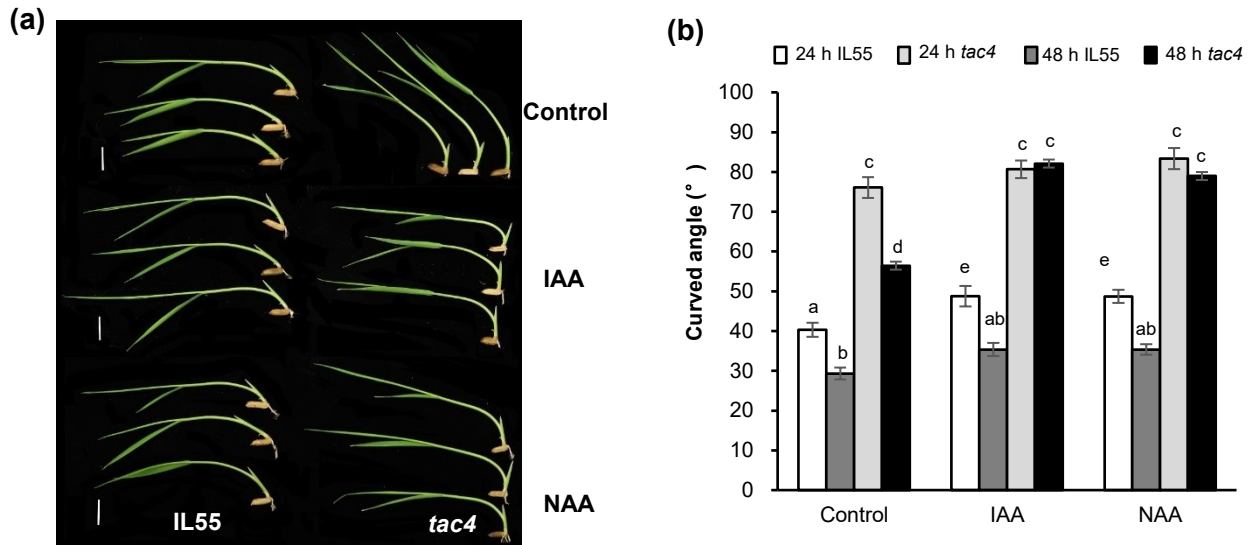

**Figure S7. The gravity response of *tac4* can be rescued by an auxin application.**

(a) Shoot curvature of IL55 and *tac4* at the seedling stage after 48 h of gravistimulation with or without application of auxin (IAA or NAA). Bar = 1 cm

(b) Shoot curvature comparisons after 24 h and 48 h of gravistimulation with or without application of auxin (5 mM IAA or 0.1 Mm NAA). Error bars indicate SEM; n = 20. Means with different letters are significantly different (P < 0.05; ANOVA).

Figure S8

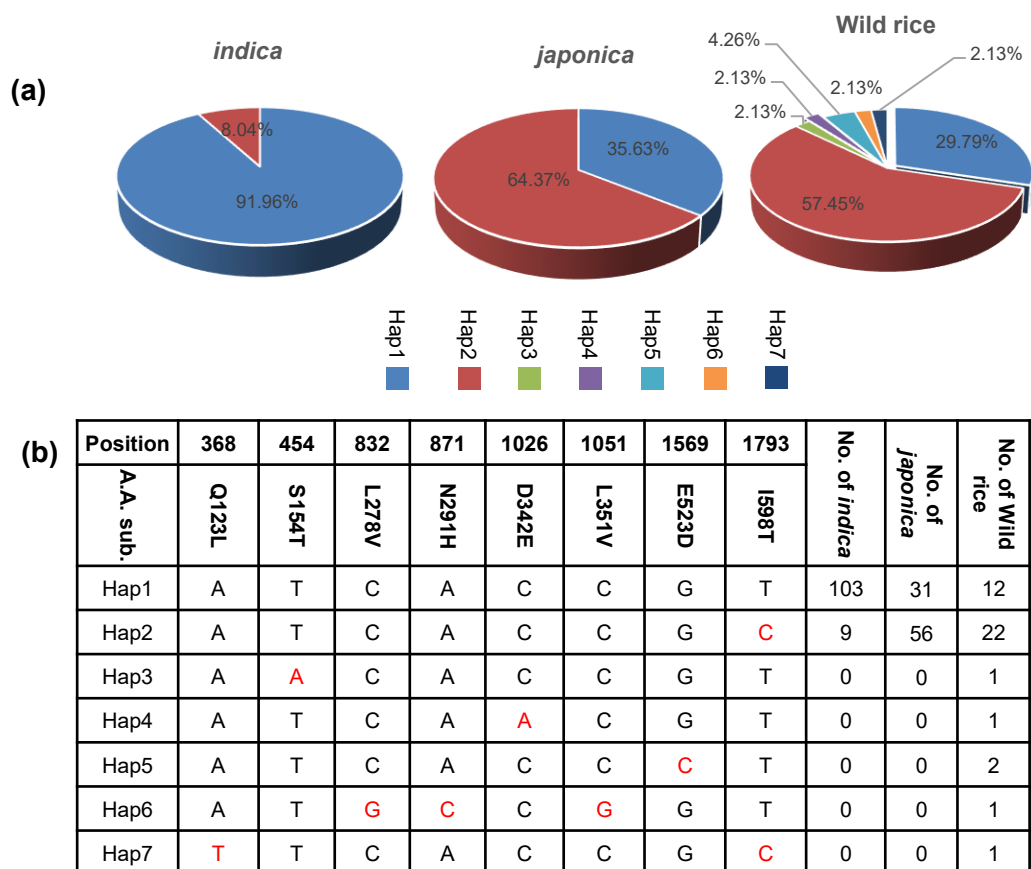

**Figure S8. *TAC4* variants in wild and cultivated rice.**

(a) Haplotype frequencies are shown as percentages for a core collection of wild and cultivated rice germplasms.

(b) The polymorphic nucleotides of Hap1–7 in the *TAC4* coding sequence



Figure S9

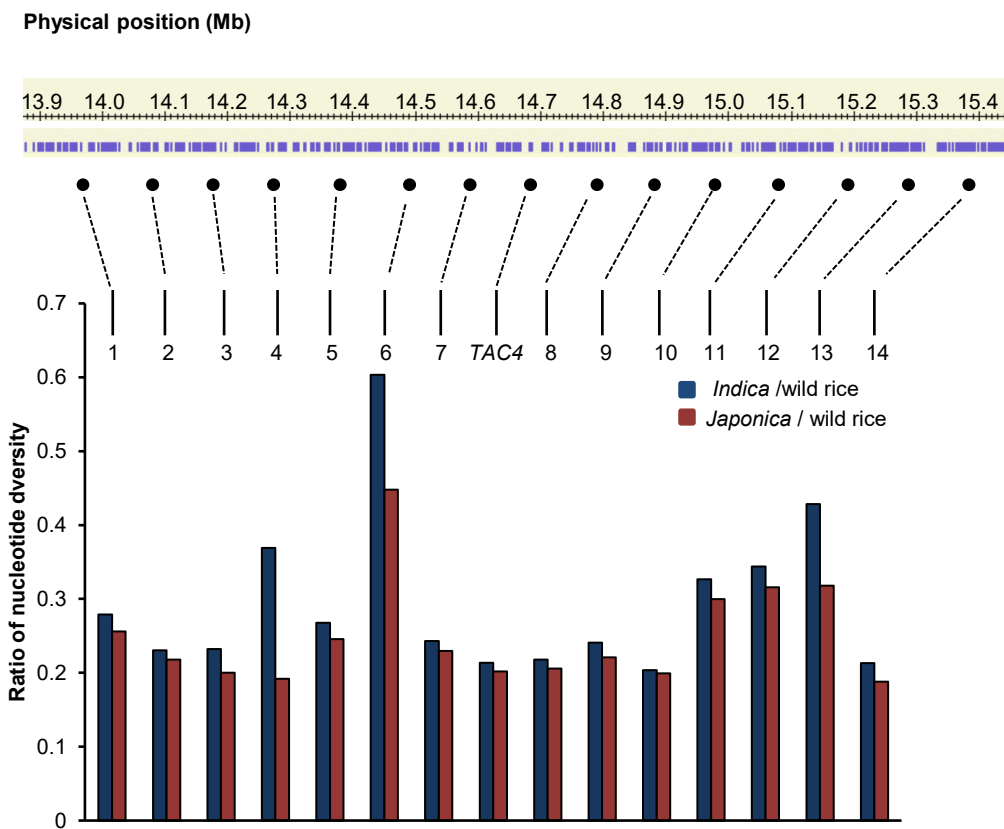

Figure S9. Comparison of diversity ratios surrounding the *TAC4* locus.

Figure S10

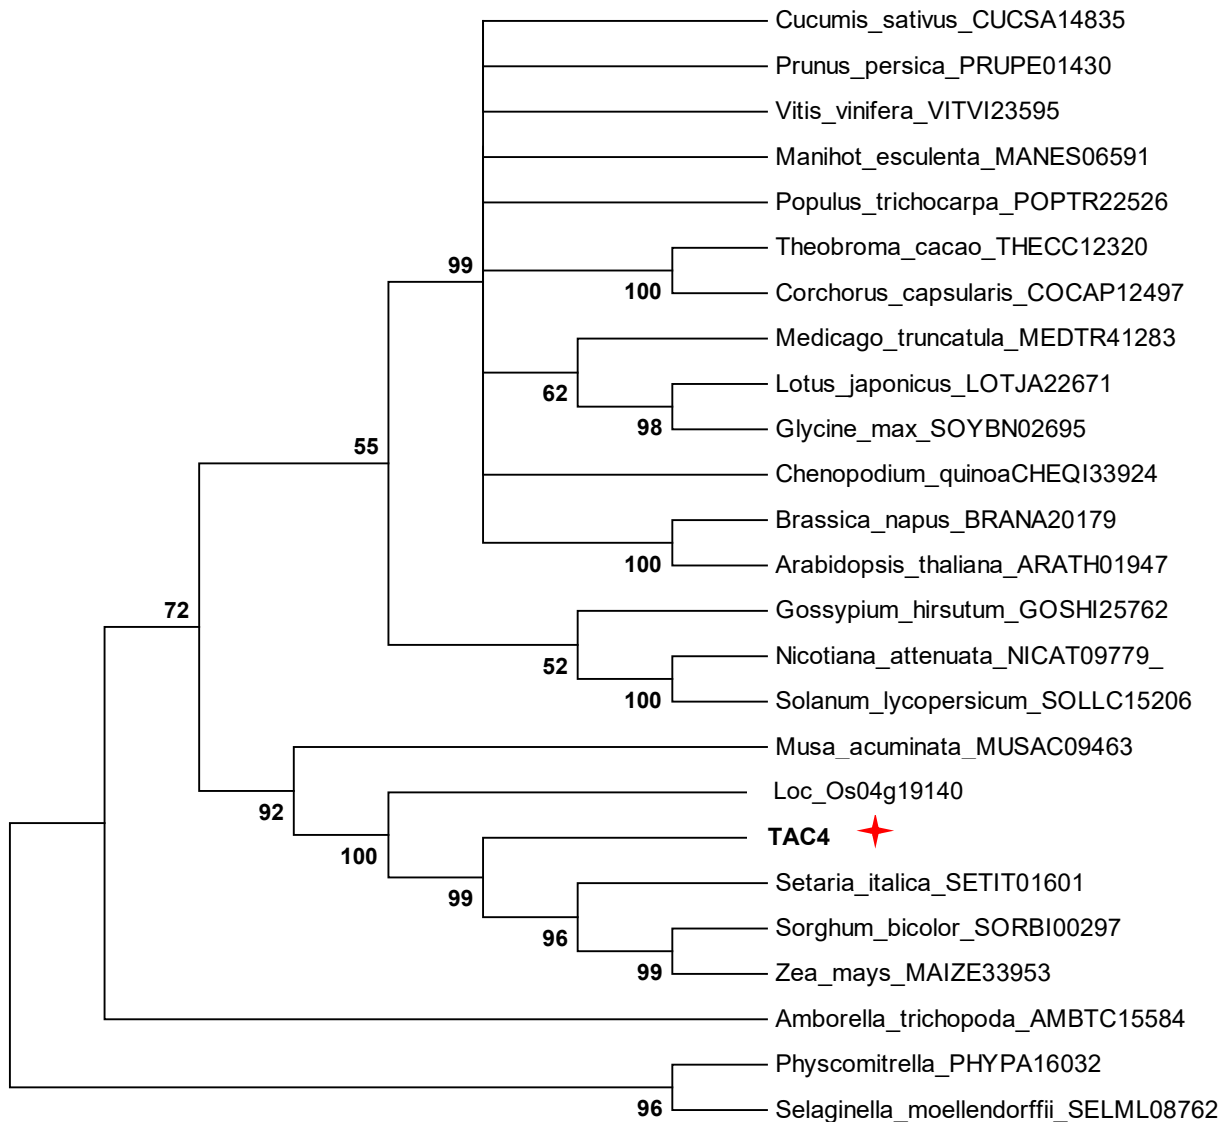

**Figure S10. Phylogenetic tree of 25 homologs of TAC4 in land plants.** The tree was constructed using MEGA 6.0 based on the neighbor joining method. The red asterisks indicates the position of TAC4.

# Figure S11

|                                    |                                                                                           |     |
|------------------------------------|-------------------------------------------------------------------------------------------|-----|
| TAC4                               | ---- MSTA-AKEEAAAASAP----APAMGEEAAAARAAAKRYEGLLTVRAKAVKGGKAWYWAHLEPVLIPADTGVPPKAVKLRG     | 76  |
| <i>Sorghum bicolor</i> _SORBI00297 | ---- MSTA-AKEEAAAASAP----APAMGEEAAAARAAAKRYEALLTVRAKAVKGGKAWYWAHLEPVLIPADTGVPPKAVKLRCA    | 77  |
| <i>Zea mays</i> _MAIZE33953        | ---- MSTATAKEEAAAAA----APAMVGEAAAARAAAKRYEALLTVRAKAVKGGKAWYWAHLEPVLIPPAETGVPPKAVKLRCA     | 76  |
| <i>Setaria italica</i> _SETIT01601 | ---- MSTASAKEEQAASASAAPAPAMGEEAAAARAAAKRYEALLTVRAKAVKGGKAWYWAHLEPVLIPADTGVPPKAVKLRCA      | 81  |
| Loc_Os04g19140                     | MSAEEAGGASAEASGSGSAPAGAAVMPVCGEEAAAARAAAKRYDALMQRVRAKAVKGGKAWYWAHLEPVLIPPPGSGVPPKAVKLRCA  | 85  |
| TAC4                               | LCSAVFASASNPSRTIASEHLKRGICPNFASPPPGAAASGSSGSHQQQTQQAALCALPPPNSTASSPIPISSIAPSSPRHHPHHS     | 161 |
| <i>Sorghum bicolor</i> _SORBI00297 | LCSAVFASASNPSRTIASEHLKRGICPNFAALPTGPAAGSGSQPSQHPSTTQQAACLALPSNSTASSPVPISIIAPSSPRHHCHHH    | 161 |
| <i>Zea mays</i> _MAIZE33953        | LCSAVFASASNPSRTIASEHLKRGICPNFASPPPGAGASALQPAQHPTPTQQAACLALPSNSTASSPVPISIIAPSSSRHHPHHH     | 162 |
| <i>Setaria italica</i> _SETIT01601 | LCSAVFASASNPSRTIASEHLKRGICPNFAAPPGPAAASGSSGSHPTTTPAQHQCLALPSNSTASSPIPISYIAPSSPRHHPHHS     | 166 |
| Loc_Os04g19140                     | LCAATFASASNPSRTIASEHLKRCACPNFAAQQGAAAPHQAMTVQHQQTQQAALCALPPNSAASSVPIISSIPSSORHHPHHS       | 170 |
| TAC4                               | QCCQPQSIIHHHHHSGSRKRHSMPAYTAAEPVSHHLLVVDPSLTVSPPLPALPPPQQPQSALVLSGGKEDLICALMLED           | 246 |
| <i>Sorghum bicolor</i> _SORBI00297 | SPQNPHHHQQQQQSGSRKRHTMPPAYTPADPVSHHLLVVDPSVYSPALPALPAAPPQHSSALVLSGGKDDLICALMLED           | 246 |
| <i>Zea mays</i> _MAIZE33953        | SPQNPHHHHHQQQQSGSRKRHSMPAYTAAEPVSHHLLVVDPSLTVSPALPALPAPPPHGSSALVLSGGKDDLICALMLED          | 247 |
| <i>Setaria italica</i> _SETIT01601 | QCCQQRHQHQHHHHHSGSRKRHSMPAYTPADPRSHHLLVVDPSVYSPALPALPAPPPHGSSALVLSGGKEDLICALMLED          | 251 |
| Loc_Os04g19140                     | QCCQPQSIIHRHSTGGGRKRHALAAAYAAVEAAASHHLLVVDPSVYSPPTTPPALPAPRQVLSALVLSGGKEDLICALMLED        | 255 |
| TAC4                               | VKRLKSPKASPGAMLPKQOADAALALLAEWFLLESSGGVSLSAVANPKLRSFLRVGLPELQRTDLGAGRLDARFAEARADATARY     | 331 |
| <i>Sorghum bicolor</i> _SORBI00297 | VKRLKSPKASPVAMPKQOADAAMVADWFLLESSPGVSLSAASHPKLRAFLRVGLPDLQRADLAGPRLDARFAEARADATARY        | 331 |
| <i>Zea mays</i> _MAIZE33953        | VKRLKSPKASPVTMPKQOADAALALLSDWFLLESSPGVSLSAASHPKLRAFLRVGLPDLQRADLAGPRLDARFAEARADATARY      | 332 |
| <i>Setaria italica</i> _SETIT01601 | VKRLKSPKASPAAMMPKAOADAALGLLADWFLLESSAGVSLSSASHPKLRAFLRVGLPDLQRADLAGPRLDARFAEARADATARY     | 336 |
| Loc_Os04g19140                     | VKRLKSPVASPGAMLPKQQAFAALALLAEWFLLESSGVSLSAHEPKLKAFLRQVGLPELSRAELAGARLNARFAEARADAAARI      | 340 |
| TAC4                               | RDALFFQLAADGWREQVVTLSVNLNGTGVFRAVVPVPAAPSDYAEVLIDAVASVSAAGSSNDLHHCAGIADRFKSKALRDL         | 416 |
| <i>Sorghum bicolor</i> _SORBI00297 | RDALFFQLAADGWREQVVTLSVNLNGTGVFRAVVPVPAAPSDYAEELMNAVASVSAAGSSNDLHHCAGIADRFKSKALRDL         | 416 |
| <i>Zea mays</i> _MAIZE33953        | RDALFFQLAADGWREQVVTLSVNLNGTGVFRAVVPVPAAPSDYAEELMNAVASVSAAGSSNDLHHCAGIADRFKSKALRDL         | 417 |
| <i>Setaria italica</i> _SETIT01601 | RDALFFQFAADGWREQVVTLSVNLNGTGVFRAVVPVPAAPSDYAEELMNAVASVSSAGSSNDLHHCAGIADRFKSKALRDL         | 421 |
| Loc_Os04g19140                     | REARFFQLAADGWREQVVTLSVNLNGASVFERAVPTPAPASSDYAEQLMELIASSVASAGSSSEELHHCAGIADRFKSKALRDL      | 425 |
| TAC4                               | ENKHHWVWNLSCQIHGFTRLMVDFARELPLFRSAAAKSAKLAAYFNAAKTVRSLLHKHQIQELGHASLLRVAHVPFNNGSDYRA      | 501 |
| <i>Sorghum bicolor</i> _SORBI00297 | ENKHYWVWNLCCQHSFTHLMVDFARELPLFRSATAKSAKLAAYFNAAKTVRSLLHKHQIQELGYASLLRVAHVPFNNGSNCRRA      | 501 |
| <i>Zea mays</i> _MAIZE33953        | ENKHYWVWNLSCQIHGFTRLMVDFARELPLFRSATAKSAKLAAYFNAAKTVRSLLHKHQIQELGHASLLRVAHVPFNNGSNCRNRA    | 502 |
| <i>Setaria italica</i> _SETIT01601 | ENKHHWVWNLSCQIHGFTRLMVDFARELPLFRSAAAKSAKLAAYFNAAKTVRSLLKQYQIQELGHASLLRVAHVPFNNGSDDFRA     | 506 |
| Loc_Os04g19140                     | ENKHPWVWNLACQVHGLSRVDFARELPLFRSASANCAKLAAYFNAAKTVRSLLHKHQIQEIGHASLLRVAHVPFNNGSDYAA        | 510 |
| TAC4                               | AFEMLEDLTSARPLQLAVHEESYKLVCIDDSAAREMADMDDGSFVSEVAVLVLKLIQMDVVKEMETDRPLVGCCPLVEELR         | 586 |
| <i>Sorghum bicolor</i> _SORBI00297 | AFDMLEDIENSAHPLHRAVQEDSYKLVCIDDSAAREIEMVHSEAFWIEVDAAVSLVKLIQMDVVKEMETDRPLVGCCPLVEELR      | 586 |
| <i>Zea mays</i> _MAIZE33953        | AFEMLEDLNSAHPLHRAVQEDSYKLVCIDDSAAREIEMVHSEAFWIEVDAAVSLVKLIQMDVVKEMETDRPLVGCCPLVEELR       | 587 |
| <i>Setaria italica</i> _SETIT01601 | AFEMLEDLNSAHPLHRAVQEDSYKLVCIDDSAAREMGEVHNEAFWIEVDAAVSLVKLIQMDVVKEMEGDRPLVGCCPLVEELR       | 591 |
| Loc_Os04g19140                     | AFAMLEDLTSARPLQLAVHEESYKLVCIDDPAAREVGSVMKVAVFTEVBAASLVKLIQMDVVKEMEAERPLVGCCPLVEELR        | 595 |
| TAC4                               | GKVRDWCQKFNIDEGAALNVVEKFRKRYHPAWSAAFLDPLYLKDAASGRYLPPFKCLTPDCEKDQVDRLLTRVMSREEAHLVLM      | 671 |
| <i>Sorghum bicolor</i> _SORBI00297 | SKVRDWCQKFNIDEGTVLNVLEKFRKRYHPAWSAAFLDPLYLKDAASGRYLPPFKCLTPDCEKDQVDRLLTRVMSREEAHLVLM      | 671 |
| <i>Zea mays</i> _MAIZE33953        | SKVRDWCQKFNIDEGAALNVLEKFRKRYHPAWSAAFLDPLYLKDAASGRYLPPFKCLTPDCEKDQVDRLLTRVMSREEAHLVLM      | 672 |
| <i>Setaria italica</i> _SETIT01601 | SKVRDWCQKFNIDEGIALNVVEKFRKRYHPAWSAAFLDPLYLKDAASGRYLPPFKCLAPDCEKDQVDRLLTRVMSQEEAHLALM      | 676 |
| Loc_Os04g19140                     | GKVRDWCQKFNIDEGIAMNVVEVFRKRYHPAWSAAFLDPLYLKDVSGRYLPPFKYLTPEQDKDQVDRLLTRLVSPREEAHLALM      | 680 |
| TAC4                               | ELMKWRSEGLDPLIYAQAVQVRQDPDSTGKMKVANKQSSRLVVIETCLSELKSLGKQAVRLLFLHATARSFRCTPSMVRWLCAPGSL   | 756 |
| <i>Sorghum bicolor</i> _SORBI00297 | ELMKWRSDGLDPLIYAQAVQVRQDPDSTGKMKVANKQSSRLVVIETCLSELKSLGKQAVRLLFLHATARSFRCTPSMVRWLCAPGSL   | 756 |
| <i>Zea mays</i> _MAIZE33953        | ELMKWRSDGLDPLIYAQAVQVRQDPDSTGKMKVANKQSSRLVVIETCLSELKSLGKQAVRLLFLHATARSFRCTPSMVRWLCAPGSM   | 757 |
| <i>Setaria italica</i> _SETIT01601 | ELMKWRSDGLDPLIYAQAVQVRQDPDSTGKMKVANKQSSRLVVIETCLSEFVKSLLGKQAVRLLFLHATARSFRCTPSMVRWLVSSPGL | 761 |
| Loc_Os04g19140                     | ELMKWRSEGLDPLIYAQAVQVRQDPDSTGKMRVANKQSSRLVVIETCLSDLKSLGKQAVRLLFLHATAKGFRCTAPPMSRVLTPAGSS  | 765 |
| TAC4                               | AGGIDRAHRLVFVAANSKLERDDFSSDEDKDAELITEGDDVLENEPGS-LERSV-----                               | 810 |
| <i>Sorghum bicolor</i> _SORBI00297 | ASGNDRAHRLAFVAANSKLERDDFSSDEDKDAELITEGDDVVNLPGN-AEPSSV-----                               | 810 |
| <i>Zea mays</i> _MAIZE33953        | ASGNDRAHRLVFVAANSKLERDDFSSDEDKDAELITEGDDVLDVPGT-VEPSSV-----                               | 811 |
| <i>Setaria italica</i> _SETIT01601 | ASSTNRAHRLVFVAANSKLERDDFSSDEDKDAELITEGDDFANEPGN-VEPSSVFWGGELGMRWRYALSFHDQVWLANDCLFC       | 845 |
| Loc_Os04g19140                     | AAGIARAQRLVYVAANSKLERDDFSSDDDKDELITEGDDVLETEATASVDPSSV-----                               | 820 |

**Figure S11. Multiple alignment of TAC4 and its homologs.** Conserved amino acids are highlighted in shades of black and gray: white letters with black background (100% identity), black letters with gray background (80% identity). The red asterisks indicates the position of *tac4* stop codon.

# Figure S12

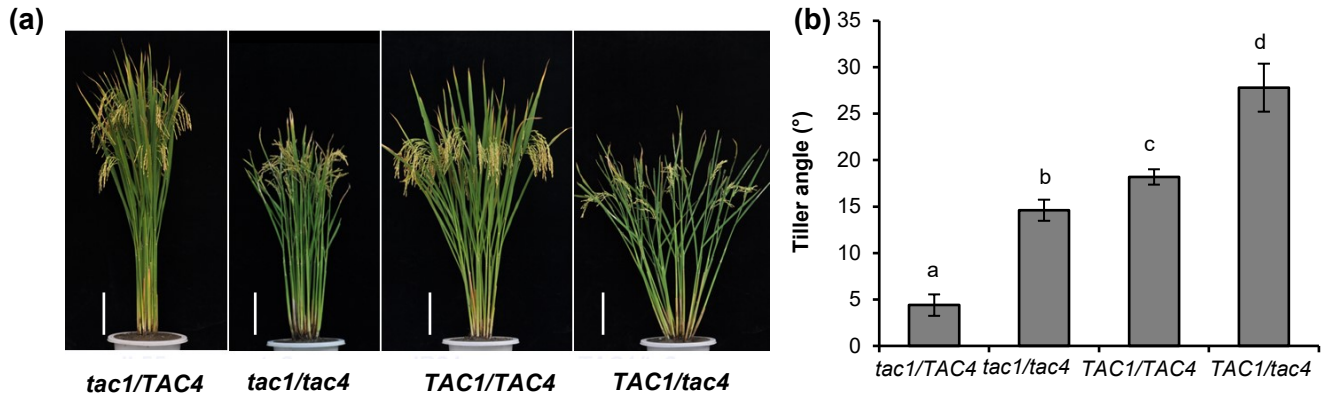

**Figure S12. *TAC4*'s regulation of tiller angle is independent of *TAC1*.**

(a) The morphology of *tac1/TAC4* (IL55), *tac1/tac4*, *TAC1/TAC4*, and *TAC1/tac4*. Scale bar, 20 cm.

(b) Comparison of tiller angle. Error bars indicate SEM, n = 5. Means with different letters are significantly different ( $P < 0.05$ ; ANOVA).
